# Supplementary material for: Hyaluronan-coated Prussian blue nanoparticles relieve LPS-induced peritonitis by suppressing oxidative species generation in tissue-resident macrophages
Source: Royal Society of Chemistry journal article supplement (doi:10.1039/d1bm01796a), 2022-01-01
Supplement: d1bm01796a1.pdf [file d1bm01796a1.pdf]

Supplementary Figures:

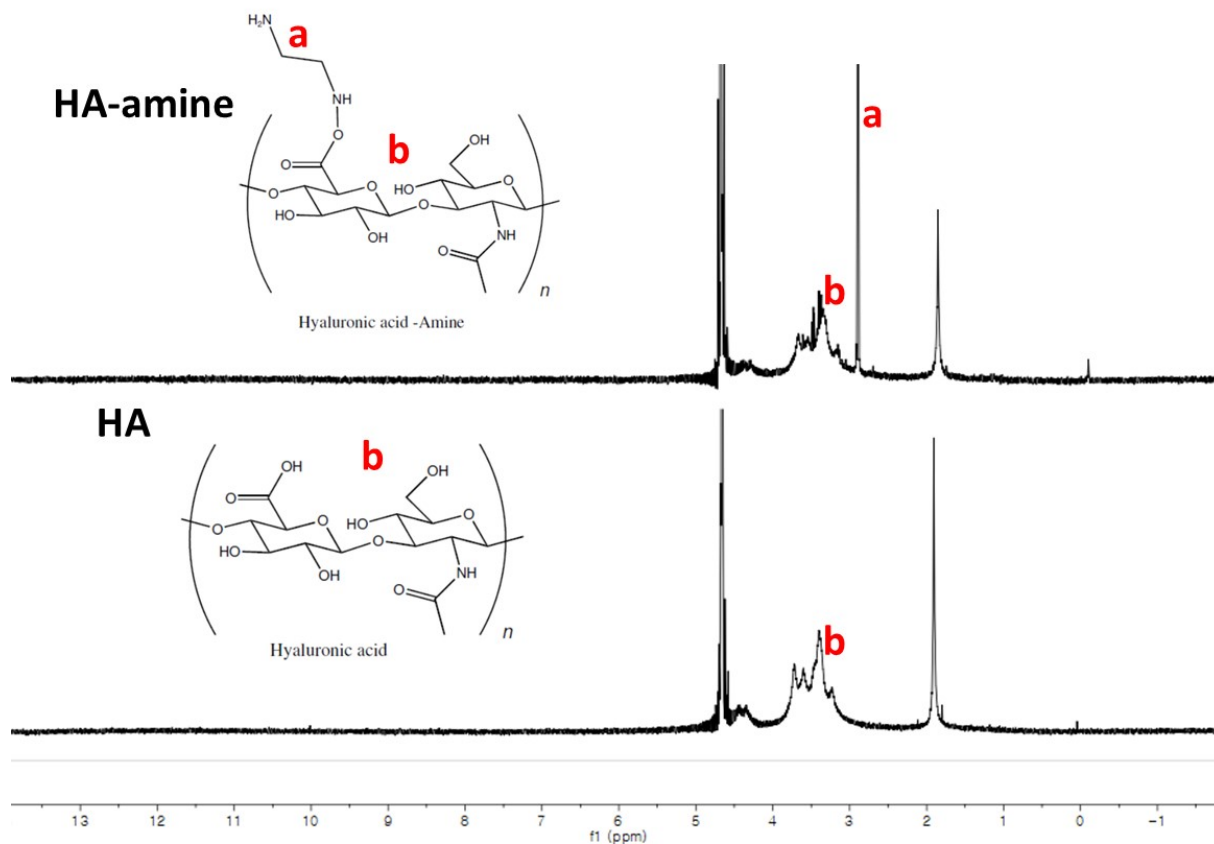

Figure S1: HNMR of hyaluronic acid conjugated ethylene diamine (EDA).

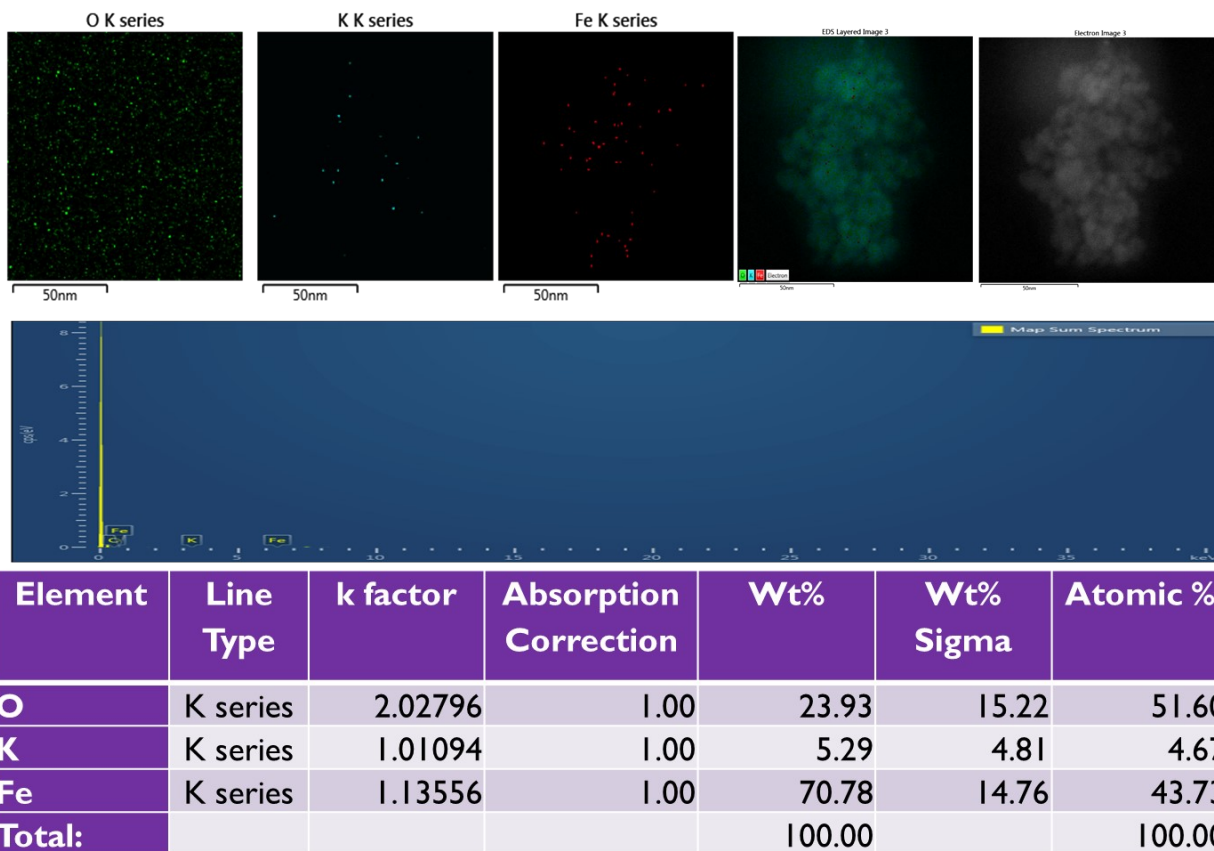

**Figure S2:** Energy dispersive X-ray spectroscopy (EDS) analysis for insoluble Prussian blue.

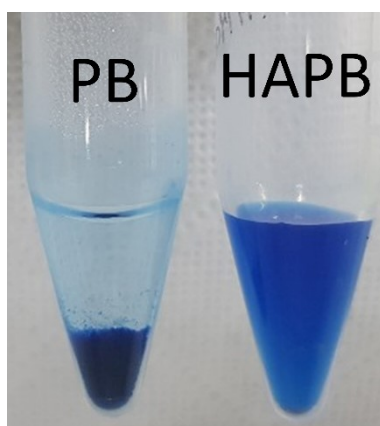

**Figure S3:** Photographic image of insoluble PB and HAPB in water after 96 hrs.

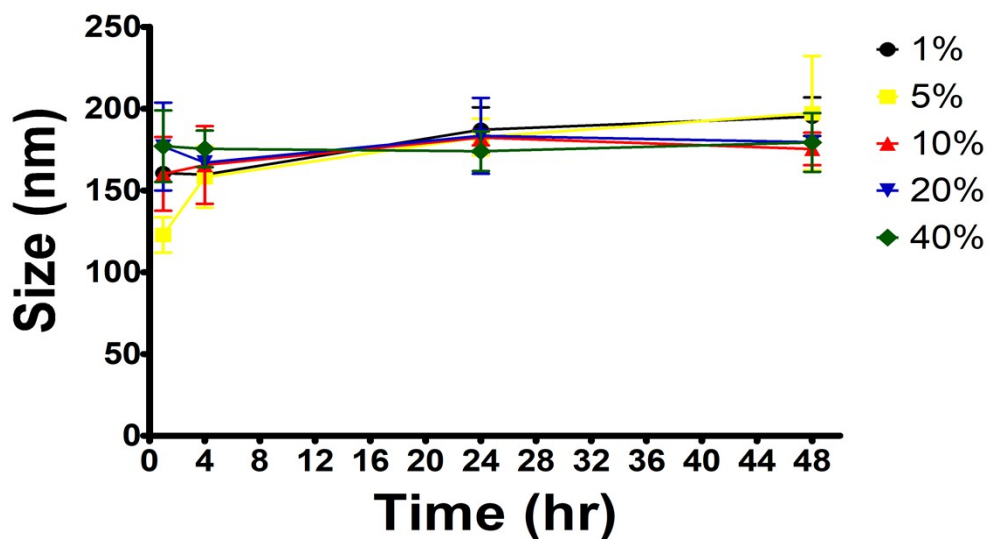

**Figure S4:** Hydrodynamic size of HAPB nanoparticle with different percentage of HA-EDA coating.

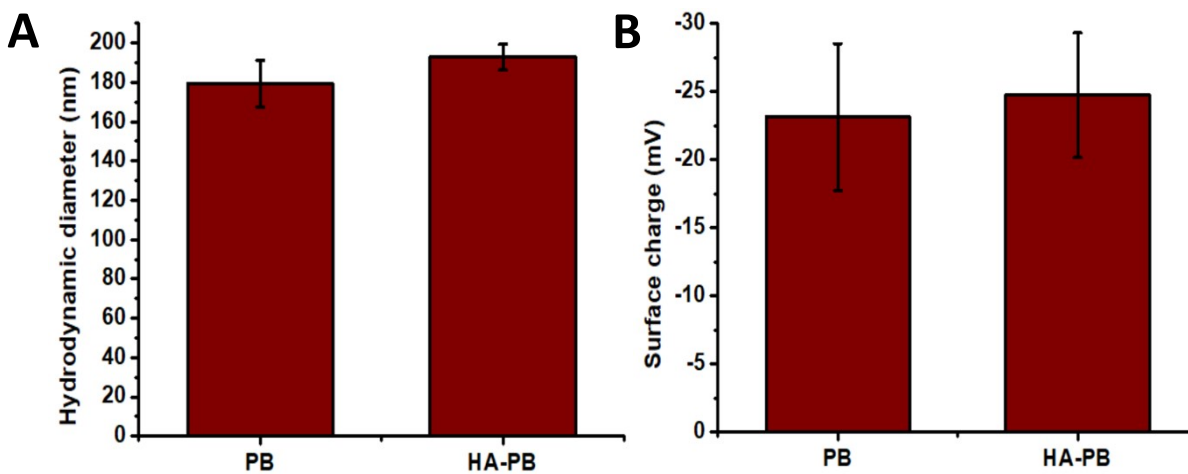

**Figure S5:** Characterization of insoluble PB and HAPB. A) Hydrodynamic size B) Zeta potential of PB and HAPB.

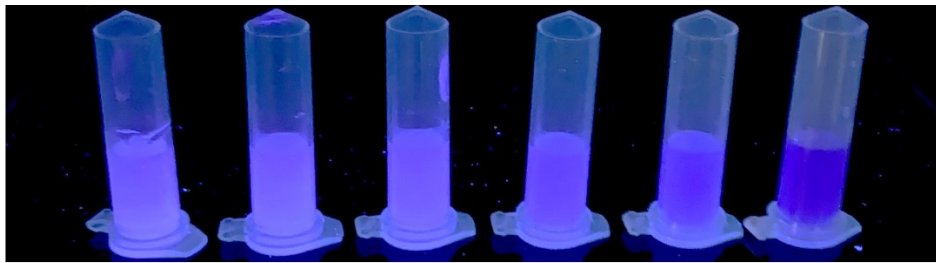

|                                  |   |        |       |      |          |          |
|----------------------------------|---|--------|-------|------|----------|----------|
| TA+H <sub>2</sub> O <sub>2</sub> | + | +      | +     | +    | +        | +        |
| HAPB                             | - | 15.625 | 31.25 | 62.5 | 125ug/ml | 250ug/ml |

**Figure S6:** UV image of HAPB treated TA/H<sub>2</sub>O<sub>2</sub> solution.

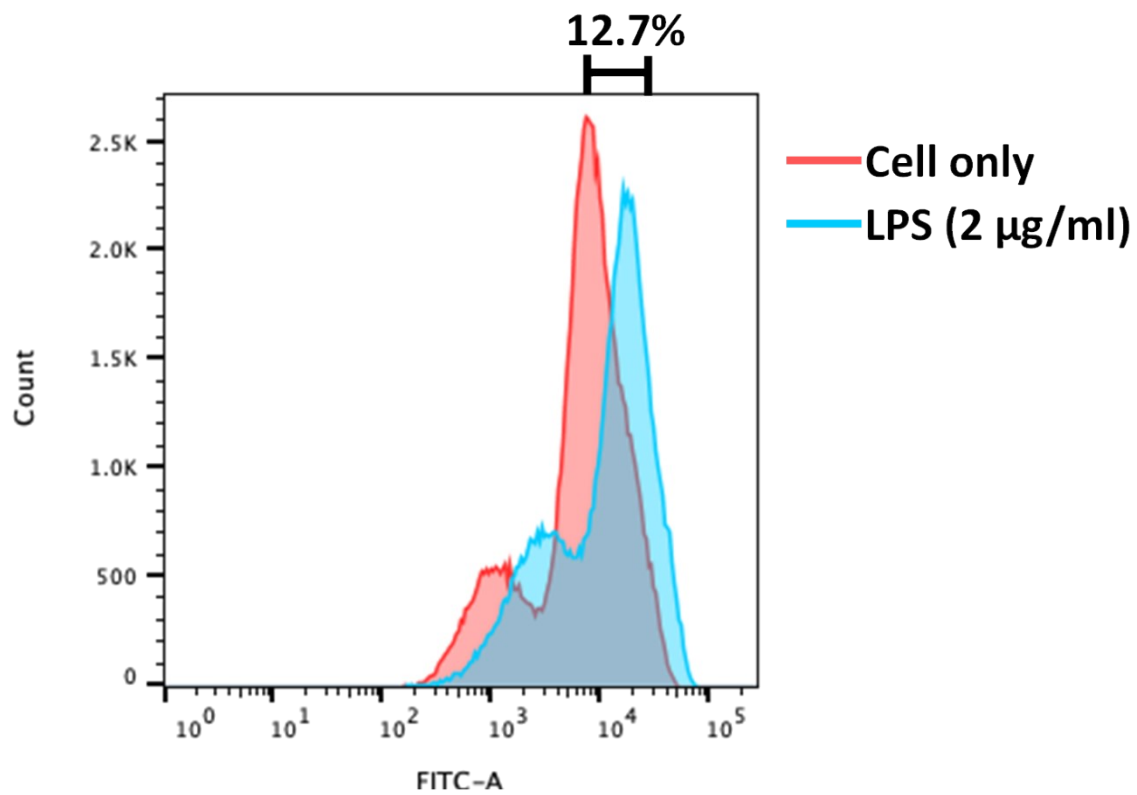

**Figure S7:** flow cytometry analysis of CD44 expression in LPS treated RAW264.7 cell line.

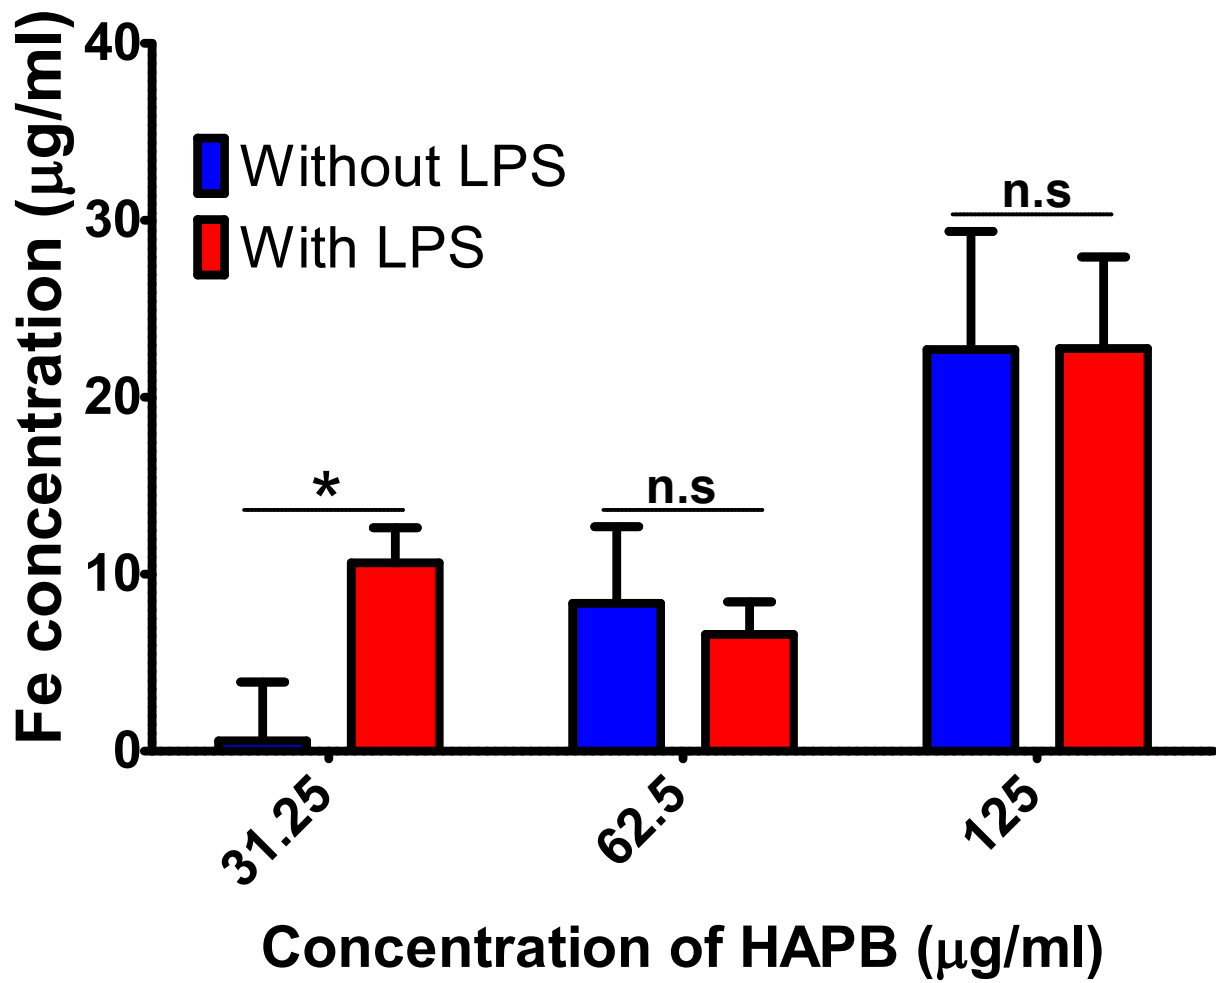

**Figure S8:** ICPMS analysis of HAPB treated RAW264.7 cell line in the presence and absence of LPS. N=3, SEM, \*p<0.05, n.s. No significance.

**A**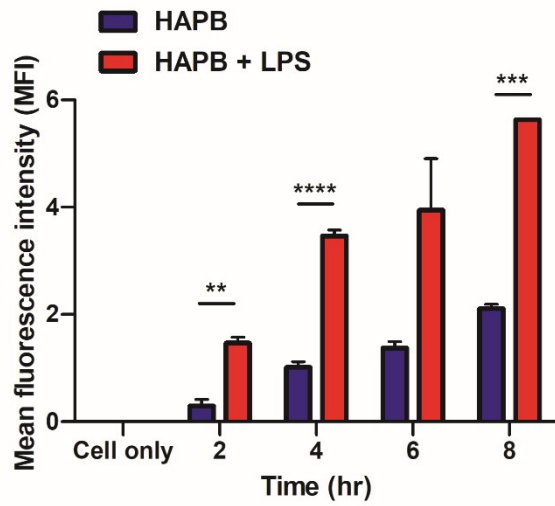**B**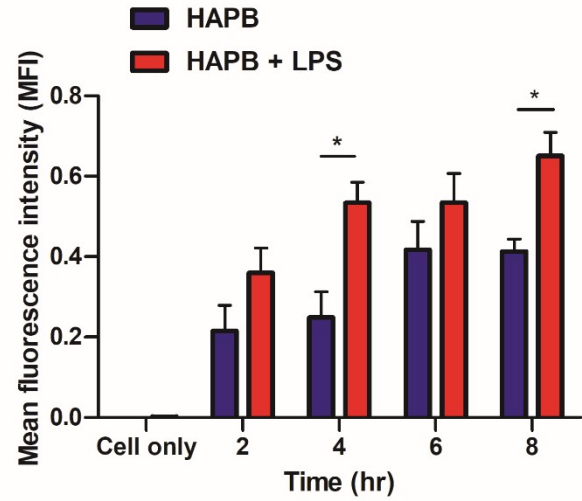

**Figure S9.** Fluorescent intensity of HAPB treated LPS activated A) RAW264.7 and B) peritoneal cells. N = 4, SEM, \*p < 0.05, \*\*p < 0.01, \*\*\*p < 0.001, \*\*\*\*p < 0.0001.

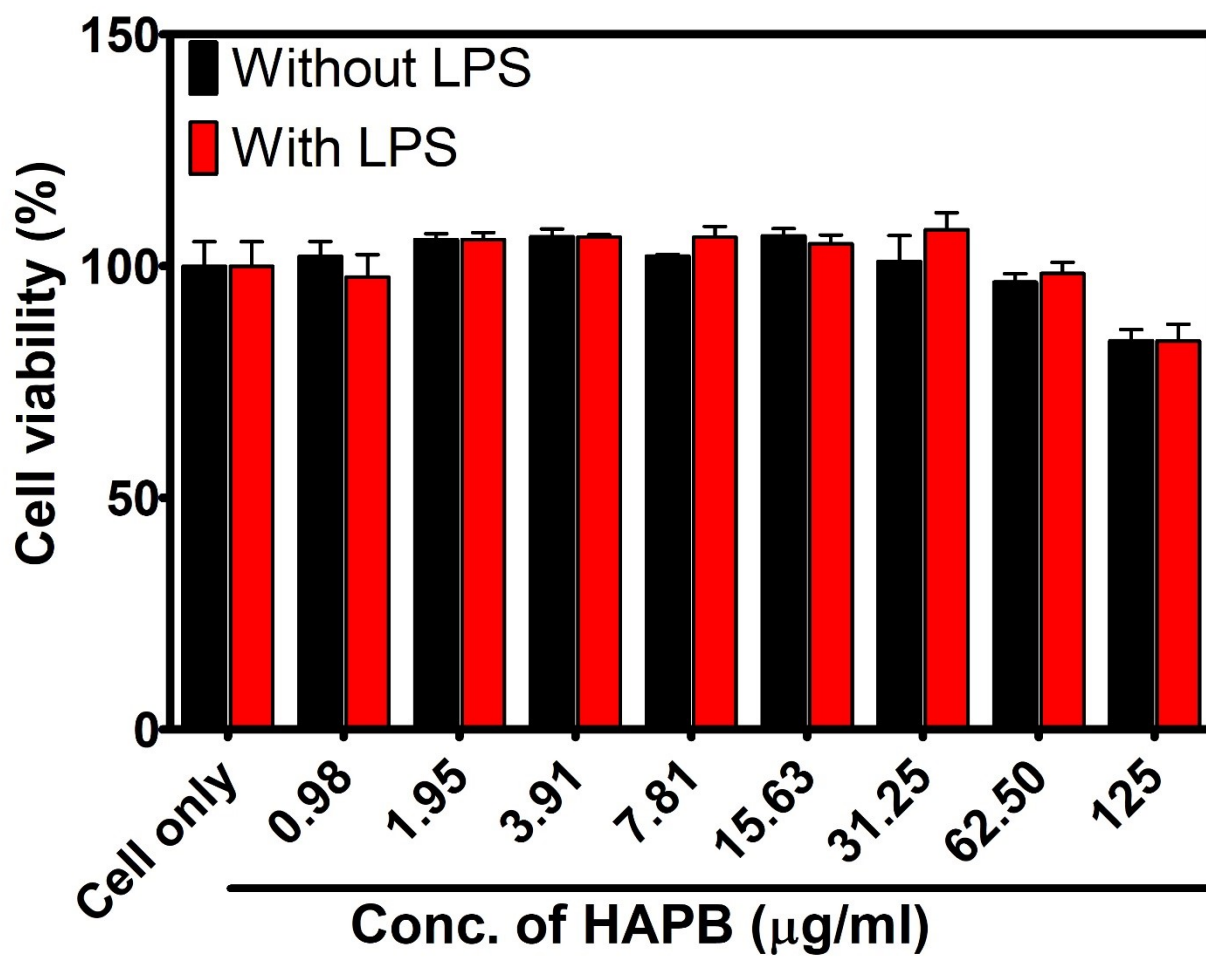

**Figure S10:** Cell viability analysis of HAPB treated RAW264.7 cell line in the presence and absence of LPS.

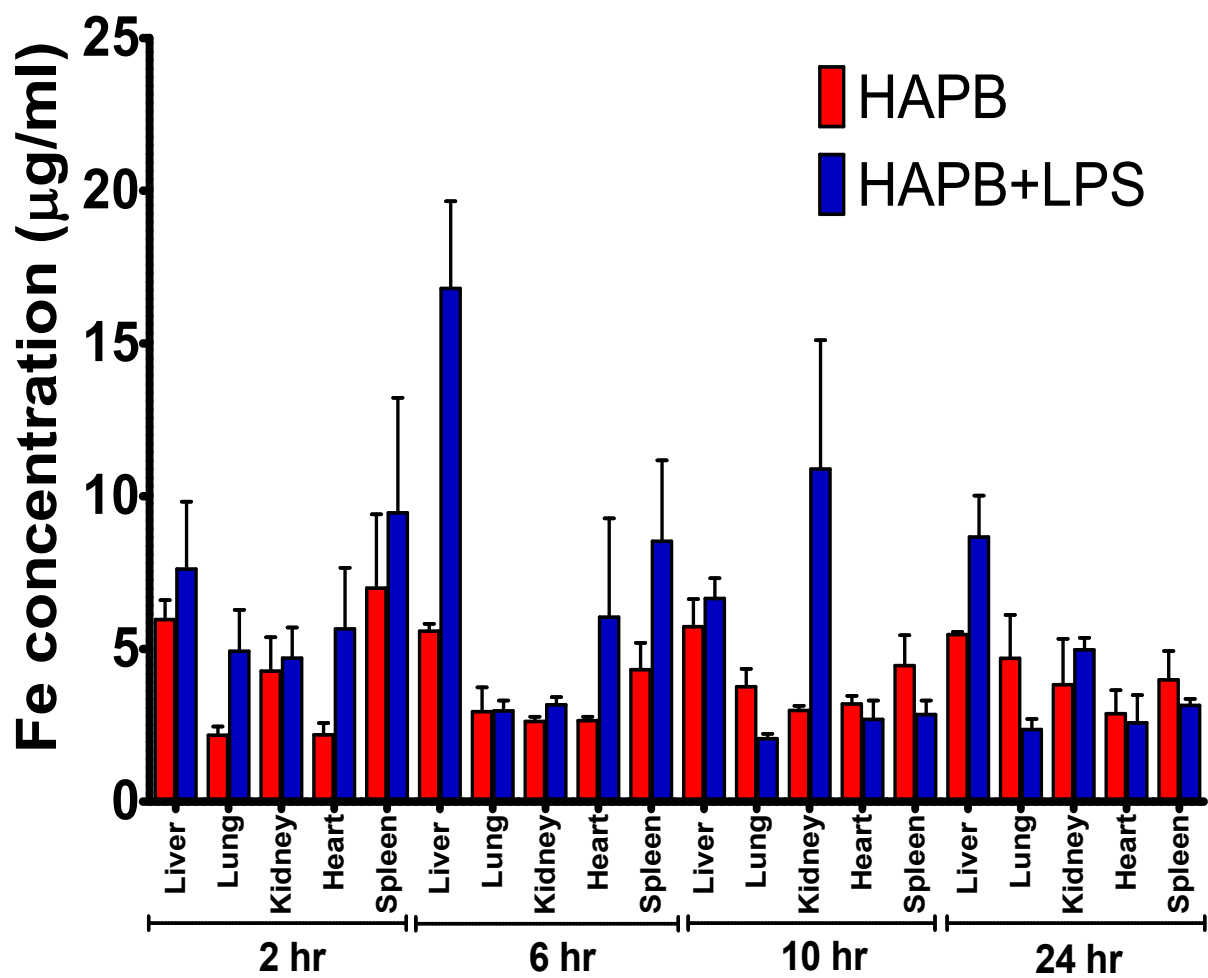

**Figure S11:** ICPMS analysis of Fe in liver, lung, kidney, heart, and spleen from HAPB administered LPS induced peritonitis C57BL/6 mice.



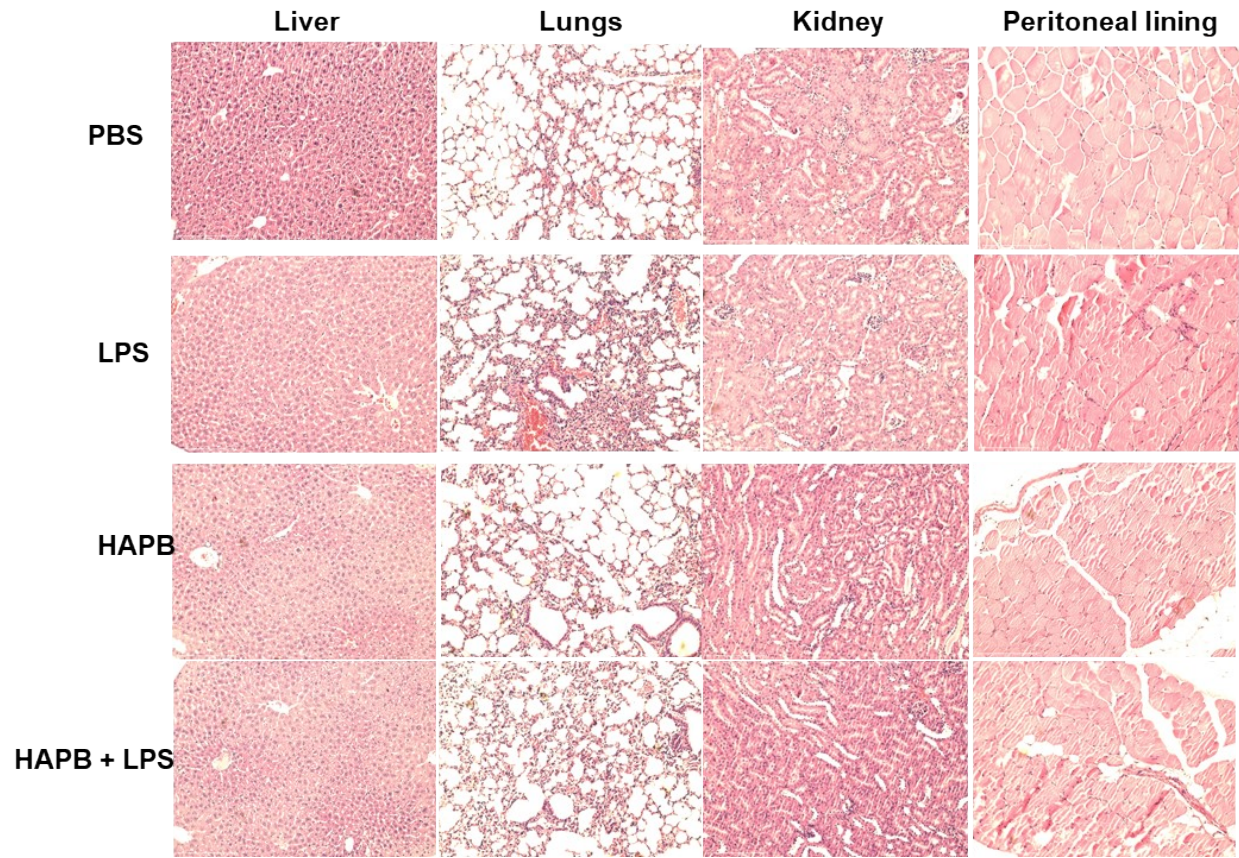

**Figure S12:** Histological analysis of liver, lung, kidney, and peritoneal lining using H & E staining in HAPB treated LPS induced peritoneal mouse model.
